# Supplementary material for: Comparative Evaluation of Vertical Fracture Resistance and Retrieval Outcomes Using Ultrasonic, LeoPen Loop, and XP-Endo Shaper Systems: An In Vitro Study
Source: Research Square preprint supplement (doi:10.21203/rs.3.rs-8090679/v1), 2025-12-29
Supplement: Supplementary file 1 [file 9e16430864a63db9e7200532.docx]

**Table (1). Comparison between the three groups studied according to retrieval time and vertical fracture resistance (VFR)**

| Variable | **Total (n=27)** | **Group 1 (Ultrasonic Retrieval)** | **Group 2**  **(XP Shaper)** | **Group 3 (LeoPen Loop)** | **F**  **P value** |
| --- | --- | --- | --- | --- | --- |
| **Retrieval Time(min)**  Min. – Max.  Mean± SD | 10 – 37  24.04 ± 7.70 | 10 – 29  19.78 ± 5.60 | 10 – 37  25.44 ± 8.84 | 18 – 35  26.89 ± 7.13 | F=2.37  0.11 |
| **VFR (N)**  Min. – Max.  Mean± SD | 307.3 – 1230.5  711.76 ± 230.13 | 469.3 – 1230.5  730.4 ± 241 | 461.4 – 1106.4  710 ± 215.3 | 307.3– 1042.5  694.7 ± 258.8 | F=0.051  0.95 |

**Table (2). Comparison between the three groups studied according to outcome**

| Variable | **Total (n=27)** | **Group 1 (Ultrasonic Retrieval)** | **Group 2**  **(XP Shaper)** | **Group 3 (LeoPen Loop)** | **P** |
| --- | --- | --- | --- | --- | --- |
| **Outcome**  Success  Failure | 15 (55.6)  12 (44.4) | 6 (66.7)  3 (33.3) | 1 (11.1)  8 (88.9) | 8 (88.9)  1 (11.1) | **0.001*** |
| **Reason for Failure**  Perforation  XP File Broken  File Located Apically  Only the US Worked  File Pushed Apically | 4 (33.3%)  5 (41.7%)  1 (8.3%)  1 (8.3%)  1 (8.3%) | 2 (66.7%)  0 (0.0%)  0 (0.0%)  0 (0.0%)  1 (33.3%) | 2 (25.0%)  5 (62.5%)  0 (0.0%)  0 (0.0%)  1 (12.5%) | 0 (0.0%)  0 (0.0%)  0 (0.0%)  1 (100.0%)  0 (0.0%) | **0.034*** |

_* significant at p value <0.05
